# Supplementary material for: Degradation of the antibiotic ornidazole in aqueous solution by using nanoscale zero-valent iron particles: kinetics, mechanism, and degradation pathway
Source: Royal Society of Chemistry journal article supplement (doi:10.1039/c8ra04079f), 2018-01-01
Supplement: c8ra04079f1.pdf [file c8ra04079f1.pdf]

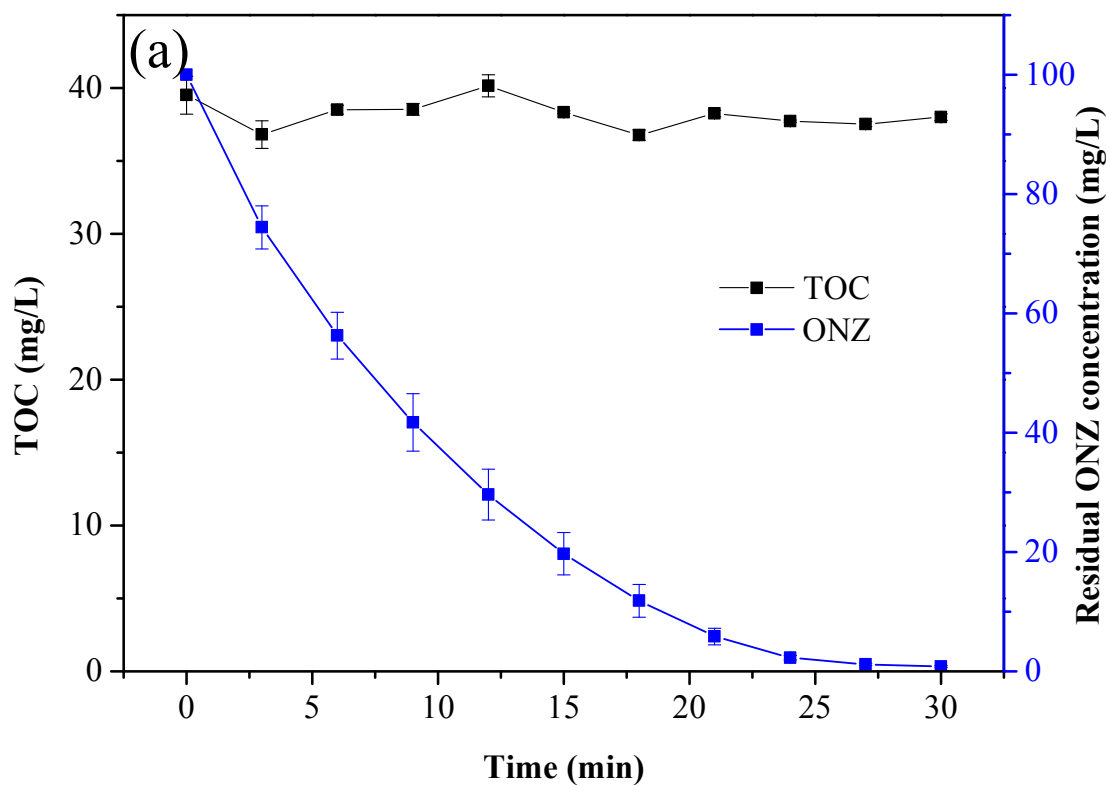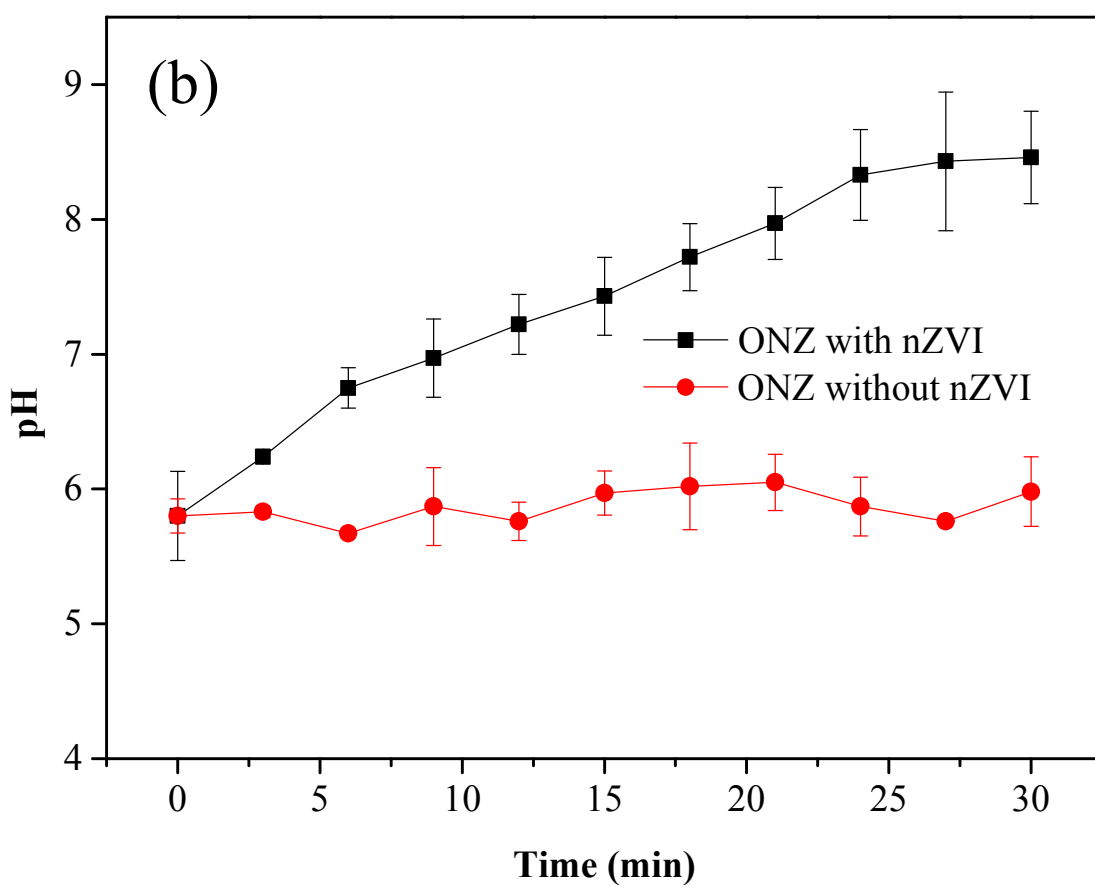

Fig. S1. Variation of TOC and ONZ concentrations (a) and pH (b) at various

times. (nZVI dosage = 0.1 g/L, N<sub>2</sub> conditions, C<sub>0</sub> = 100 mg/L, pH = 5.80, T = 25 °C).
